# Supplementary material for: SARS-CoV-2 Infection Is Associated with Uncontrolled HIV Viral Load in Non-Hospitalized HIV-Infected Patients from Gugulethu, South Africa
Source: MDPI journal article supplement (doi:10.3390/v14061222), 2022-06-03
Supplement: s1 [file s1]

## Supplementary Materials

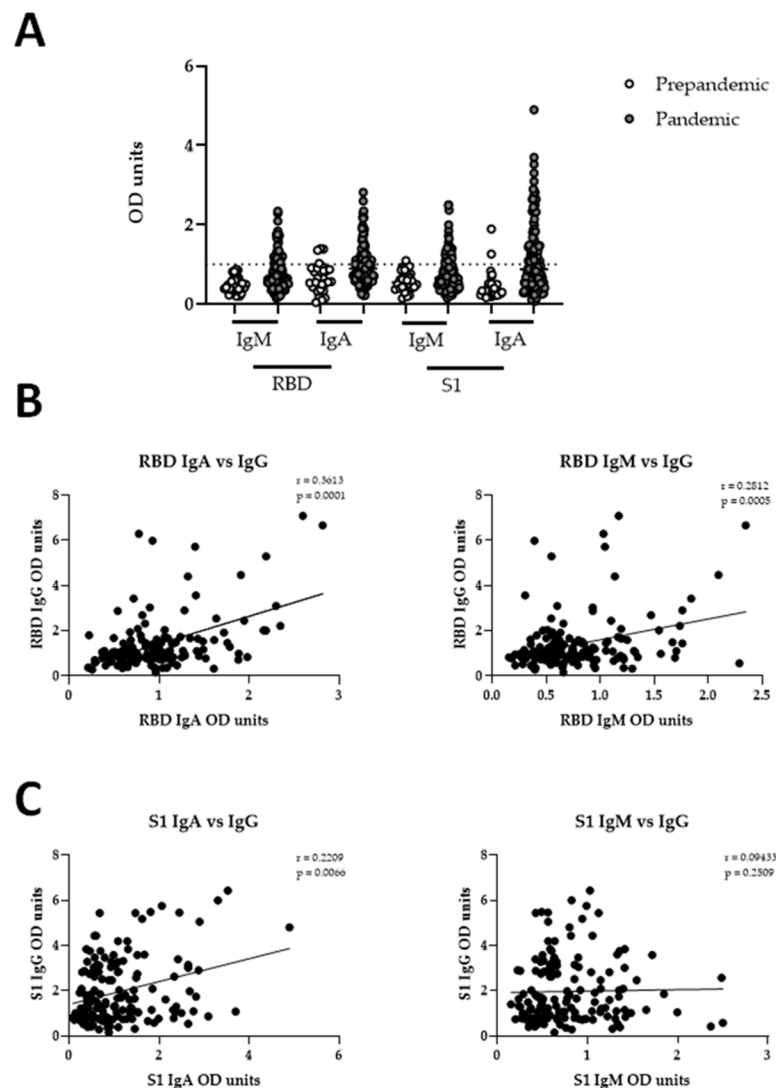

**Figure S1.** (A) Detection of SARS-CoV-2 RBD- and S1-specific IgM and IgA antibodies in the study participants' plasma. A total of thirty pre-pandemic patient samples [22] served as control. Results are represented by the OD units of each isotype, adjusted to the cut-off value of each individual plate and then normalized to the cut-off, which was set as one. The cut-off was determined by the mean OD + 2SD of the pre-pandemic samples. All samples were normalized to the cut-off value, which was set as one and is indicated by a dotted line. (B) The correlation between IgG and IgA (left panel) as well as IgG and IgM (right panel) responses to RBD SARS-CoV-2 antigens and (C) between IgG and IgA (left panel) as well as IgG and IgM (right panel) responses to S1 SARS-CoV-2 antigens. Statistical analyses were performed using a non-parametric Spearman Rank correlation.

**Table S1.** Univariate analysis comparing the distribution of IgG, IgA and IgM responses to SARS-CoV-2 S1 and RBD antigens in the entire patient cohort ( $n = 150$ ) based on the definition of IgG seroconversion, which was set at 2SD above the mean optical density of 30 pre-pandemic samples [22] for each plate. All OD values to IgM and IgA RBD and S1 were normalized to plate cut-off and defined as positive if >2SD mean optical density of the pre-pandemic samples. Data are presented as number and percentage of total or median and range as appropriate.  $P$ -values are by Mann-Whitney test for continuous variables or Fisher's Exact test for categorical variables as appropriate.  $p < 0.05$  is considered significant and indicated with \*.

|             |          | SARS-CoV-2 Antibody<br>Negative ( $n = 44$ )<br>N (%) or Median (Range) | SARS-CoV-2 Antibody<br>Positive ( $n = 106$ )<br>N (%) or Median (range) | $p$ -Value |
|-------------|----------|-------------------------------------------------------------------------|--------------------------------------------------------------------------|------------|
| RBD IgG, OD |          | 0.71 (0.16–0.96)                                                        | 1.25 (0.47–7.09)                                                         | <0.001 *   |
| RBD IgG     | negative | 44 (100.0%)                                                             | 30 (28.3%)                                                               | <0.001 *   |
|             | positive | 0 (0.0%)                                                                | 76 (71.7%)                                                               |            |
| RBD IgM, OD |          | 0.57 (0.15–2.29)                                                        | 0.67 (0.18–2.34)                                                         | 0.032 *    |
| RBD IgM     | negative | 38 (86.4%)                                                              | 75 (70.8%)                                                               | 0.043 *    |
|             | positive | 6 (13.6%)                                                               | 31 (29.2%)                                                               |            |
| RBD IgA, OD |          | 0.74 (0.21–1.98)                                                        | 0.93 (0.22–2.82)                                                         | 0.002 *    |
| RBD IgA     | negative | 34 (77.3%)                                                              | 59 (55.7%)                                                               | 0.013 *    |
|             | positive | 10 (22.7%)                                                              | 47 (44.3%)                                                               |            |
| S1 IgG, OD  |          | 0.72 (0.15–0.98)                                                        | 1.83 (0.29–6.44)                                                         | <0.001 *   |
| S1 IgG      | negative | 44 (100.0%)                                                             | 8 (7.5%)                                                                 | <0.001 *   |
|             | positive | 0 (0.0%)                                                                | 98 (92.5%)                                                               |            |
| S1 IgM, OD  |          | 0.56 (0.20–2.50)                                                        | 0.67 (0.15–2.49)                                                         | 0.028 *    |
| S1 IgM      | negative | 36 (81.8%)                                                              | 75 (70.8%)                                                               | 0.16       |
|             | positive | 8 (18.2%)                                                               | 31 (29.2%)                                                               |            |
| S1 IgA, OD  |          | 0.64 (0.08–3.09)                                                        | 1.08 (0.11–4.90)                                                         | <0.001 *   |
| S1 IgA      | negative | 36 (81.8%)                                                              | 49 (46.2%)                                                               | <0.001 *   |
|             | positive | 8 (18.2%)                                                               | 57 (53.8%)                                                               |            |

**Table S2.** Univariate analysis comparing self-reported symptoms at presentation between patients who were negative ( $n = 44$ ) and positive ( $n = 106$ ) for SARS-CoV-2 antibodies. SARS-CoV-2 antibody positivity was detected by ELISA to IgG RBD and S1 ("Negative" indicates that a patient sample had an OD value below the assay cut-off for both IgG RBD and S1 ELISAs). Data are presented as number and percentage of total. Participants with missing data are excluded per characteristic.  $p$ -values are by Fisher's Exact test.  $p < 0.05$  is considered significant.

|                      |     | SARS-CoV-2 Antibody<br>Negative ( $n = 44$ )<br>N (%) or Median (Range) | SARS-CoV-2 Antibody<br>Positive ( $n = 106$ )<br>N (%) or Median (Range) | $p$ -Value |
|----------------------|-----|-------------------------------------------------------------------------|--------------------------------------------------------------------------|------------|
| Other co-infection   | No  | 42 (95.5%)                                                              | 99 (97.1%)                                                               | 0.638      |
|                      | Yes | 2 (4.5%)                                                                | 3 (2.9%)                                                                 |            |
| Fever                | No  | 44 (100.0%)                                                             | 103 (98.1%)                                                              | 1.00       |
|                      | Yes | 0 (0.0%)                                                                | 2 (1.9%)                                                                 |            |
| Fatigue              | No  | 43 (97.7%)                                                              | 101 (96.2%)                                                              | 1.00       |
|                      | Yes | 1 (2.3%)                                                                | 4 (3.8%)                                                                 |            |
| Edema                | No  | 42 (95.5%)                                                              | 100 (96.2%)                                                              | 1.00       |
|                      | Yes | 2 (4.5%)                                                                | 4 (3.8%)                                                                 |            |
| Cachexia             | No  | 42 (97.7%)                                                              | 99 (96.1%)                                                               | 1.00       |
|                      | Yes | 1 (2.3%)                                                                | 4 (3.9%)                                                                 |            |
| Respiratory symptoms | No  | 44 (100.0%)                                                             | 95 (94.1%)                                                               | 0.178      |
|                      | Yes | 0 (0.0%)                                                                | 6 (5.9%)                                                                 |            |

|                                  |     |             |              |       |
|----------------------------------|-----|-------------|--------------|-------|
| Gastrointestinal disturbance     | No  | 42 (97.7%)  | 101 (98.1%)  | 1.00  |
|                                  | Yes | 1 (2.3%)    | 2 (1.9%)     |       |
| Arthralgia                       | No  | 40 (97.6%)  | 87 (94.6%)   | 0.666 |
|                                  | Yes | 1 (2.4%)    | 5 (5.4%)     |       |
| Altered mental state             | No  | 43 (97.7%)  | 102 (97.1%)  | 1.00  |
|                                  | Yes | 1 (2.3%)    | 3 (2.9%)     |       |
| Neuropathy                       | No  | 42 (100.0%) | 102 (97.1%)  | 0.558 |
|                                  | Yes | 0 (0.0%)    | 3 (2.9%)     |       |
| Radiographic abnormalities       | No  | 44 (100.0%) | 104 (100.0%) | 1.00  |
|                                  | Yes | 0 (0.0%)    | 0 (0.0%)     |       |
| Coughing                         | No  | 42 (100.0%) | 98 (93.3%)   | 0.192 |
|                                  | Yes | 0 (0.0%)    | 7 (6.7%)     |       |
| Loss of weight                   | No  | 40 (95.2%)  | 95 (90.5%)   | 0.510 |
|                                  | Yes | 2 (4.8%)    | 10 (9.5%)    |       |
| Night sweats                     | No  | 41 (95.3%)  | 98 (93.3%)   | 1.00  |
|                                  | Yes | 2 (4.7%)    | 7 (6.7%)     |       |
| Overall symptoms at presentation | No  | 39 (88.6%)  | 80 (75.5%)   | 0.079 |
|                                  | Yes | 5 (11.4%)   | 26 (24.5%)   |       |
